# Supplementary material
Source: publisher figshare collection journal article supplement (https://frontiersin.figshare.com/ndownloader/files/15301214)
Supplement: Supplementary file 1 [file 15301214]

Table S1. Deployment information for the full GPS+ACC logger data set on *E. helvum*. Studies with (*) were included in the final data set for analysis. Loggers were attached using two methods. Twenty loggers were mounted on the back of bats using adhesive (Sauer Hautkleber, Manfred Sauer GmbH, Lobbach, Germany) after clipping the dorsal fur below the shoulder blades. The remaining loggers were mounted on sheep skin collars that were closed using Safil-C (Aesculap/B. Braun Co, Tuttlingen, Germany) degradable polyglycolic acid suture. This ensured that loggers fell off of the animals after ca. two weeks (glued deployments) or 30 days (collars). The full data set is available at DOI: 10.5441/001/1.k8n02jn8

| **Study Site** | **Year** | **Attachment** | **GPS schedule** | **GPS on time** | **ACC burst duration (s)** | **ACC sampling rate (Hz)** | **Number of bats** | **Median # nights tracked** | **Range # nights tracked** |
| --- | --- | --- | --- | --- | --- | --- | --- | --- | --- |
| Ouagadougou, Burkina Faso * | 2013 | collar | 2.5 mins/30 mins (ACC informed) | 16h-6h | 14.088 | 18.74 | 5 | 5.310 | 3.01 - 17.04 |
| Ouagadougou, Burkina Faso * | 2014 | collar | 2.5 mins/30 mins (ACC informed) | 16h-6h | 14.088 | 18.74 | 7 | 4.330 | 0.24 - 5.47 |
| Kibi, Ghana * | 2012 | collar | 2.5 mins/30 mins (ACC informed) | 16h-6h | 14.088 | 18.74 | 4 | 4.220 | 1.24 - 5.25 |
| Kibi ,Ghana * | 2013 | collar | 2.5 mins/30 mins (ACC informed) | 16h-6h | 14.088 | 18.74 | 5 | 3.230 | 2.25 - 4.95 |
| Kasanka, Zambia * | 2013 | collar | 2.5 mins/30 mins (ACC informed) | 16h-6h | 14.088 | 18.74 | 5 | 4.480 | 0.47 - 5.49 |
| Kasanka, Zambia * | 2014 | collar | 2.5 mins/30 mins (ACC informed) | 16h-6h | 13.2 | 20.00 | 15 | 6.050 | 0.37 - 7.36 |
| Ouagadougou, Burkina Faso | 2014 | collar | 5 mins/30 mins (ACC informed) | 18h-6h | 14.088 | 18.74 | 2 | 0.810 | 0.45 - 1.17 |
| Accra, Ghana | 2009 | glued | 5 mins | 18h-6h | 14.088 | 18.74 | 3 | 1.470 | 1.47 - 3.19 |
| Accra, Ghana | 2009 | glued | 10 mins | 18h-6h | 14.088 | 18.74 | 4 | 1.965 | 0.46 - 2.47 |
| Accra, Ghana | 2011 | glued | 2.5 mins/30 mins (ACC informed) | 16h-6h | 14.088 | 18.74 | 2 | 1.750 | 1.5 - 2 |
| Accra, Ghana | 2011 | glued | 5 mins/30 mins (ACC informed) | 18h-6h | 14.088 | 18.74 | 7 | 0.960 | 0.5 - 5.5 |
| Accra, Ghana | 2012 | glued | 5 mins | 18h-6h | 14.088 | 18.74 | 1 | 0.460 | 0.46 |
| Kibi, Ghana | 2011 | glued | 2.5 mins/30 mins (ACC informed) | 16h-6h | 14.088 | 18.74 | 3 | 1.770 | 0.23 - 3.48 |
